# Supplementary material for: Comparison of the Formation of Plant–Microbial Interface in Pisum sativum L. and Medicago truncatula Gaertn. Nitrogen-Fixing Nodules
Source: MDPI journal article supplement (doi:10.3390/ijms241813850), 2023-09-08
Supplement: s1 [file s1]

## Electronic Supplementary Material

### Comparison of the Formation of Plant–Microbial Interface in *Pisum sativum* L. and *Medicago truncatula* Gaertn. Nitrogen-Fixing Nodules

Anna V. Tsyganova <sup>1,\*</sup>, Elena V. Seliverstova <sup>1,2</sup> and Viktor E. Tsyganov <sup>1</sup>

<sup>1</sup> All-Russia Research Institute for Agricultural Microbiology, Laboratory of Molecular and Cell Biology, Saint Petersburg, Russia; avtsyganova@arriam.ru (A.V.T.); elena306@yandex.ru (E.V.S.); vetsyganov@arriam.ru (V.E.T.)

<sup>2</sup> Sechenov Institute of Evolutionary Physiology and Biochemistry of the Russian Academy of Sciences, Saint Petersburg, 194223, Russia; elena306@yandex.ru (E.V.S)

\*Author for correspondence:

Anna V. Tsyganova

Tel: +7 812 4705100

E-mail: avtsyganova@arriam.ru

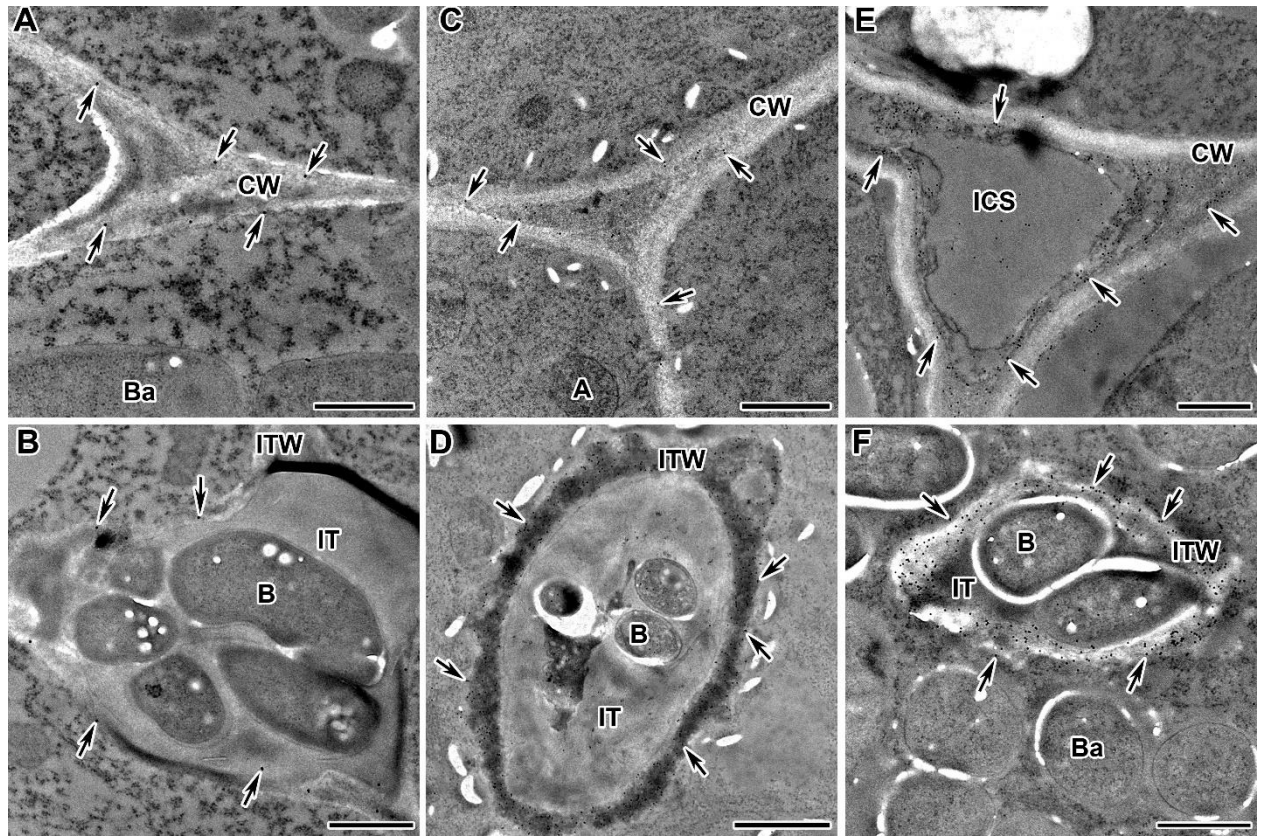

**Figure S1.** Immunogold localisation of highly methylesterified homogalacturonan labelled with LM20 (A,B), deesterified homogalacturonan labelled with LM19 (C,D) and the dimeric association of homogalacturonan chains through  $\text{Ca}^{2+}$  ions labelled with 2F4 (E,F) in nodules from wild types of *M. truncatula* (C,D) and *P. sativum* (A,B,E,F). The secondary antibody used was the goat anti-rat (A-D) and anti-mouse (E,F) IgG monoclonal antibody conjugated to 10 nm diameter colloidal gold. (A,C,E) Three-cell junctions; (B,D,F) infection threads. CW—cell wall, A—amyloplast, ICS—intercellular space, IT—infection thread, ITW—infection thread wall, B—bacterium, Ba—bacteroid; arrows indicate gold particles. Bars (D) = 1  $\mu\text{m}$ , (A-C,E,F) = 500 nm.

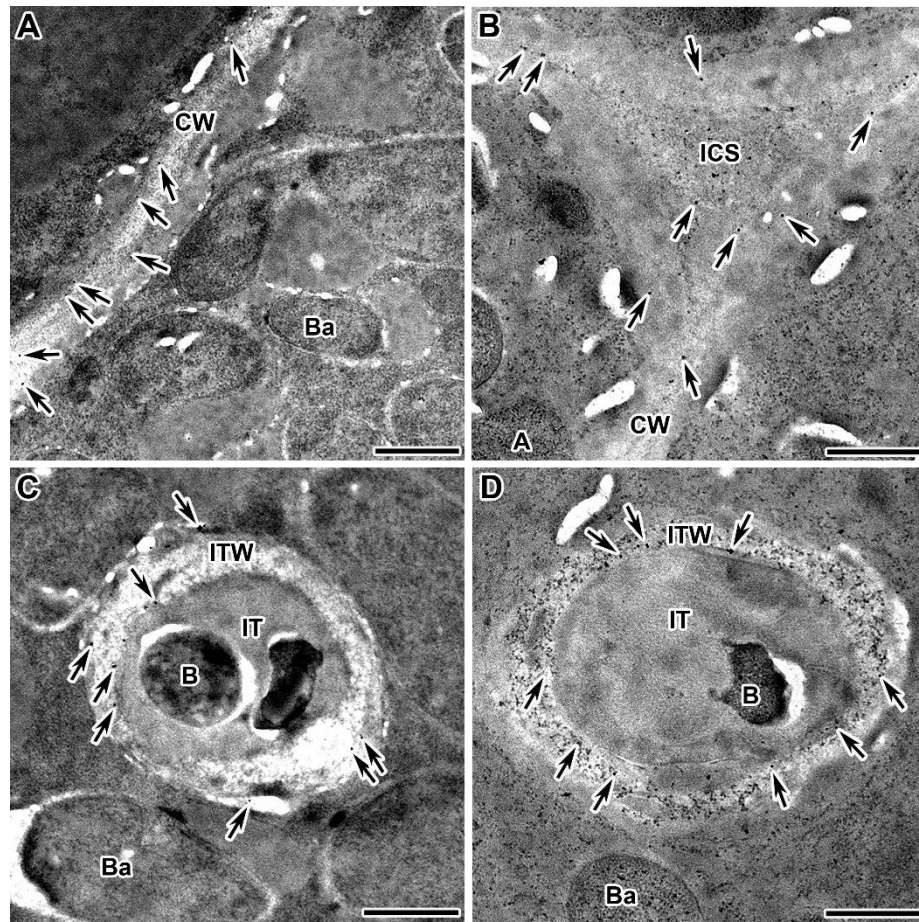

**Figure S2.** Immunogold localisation of the rhamnogalacturonan I backbone labelled with CCRC-M35 (A,C) and CCRC-M36 (B,D) in nodules from the wild-type *M. truncatula* A17. The secondary antibody used was the goat anti-mouse IgG monoclonal antibody conjugated to 10 nm diameter colloidal gold. (A,B) Cell wall and three-cell junction; (C,D) infection threads. CW—cell wall, A—amyloplast, ICS—intercellular space, IT—infection thread, ITW—infection thread wall, B—bacterium, Ba—bacteroid; arrows indicate gold particles. Bar = 500 nm.

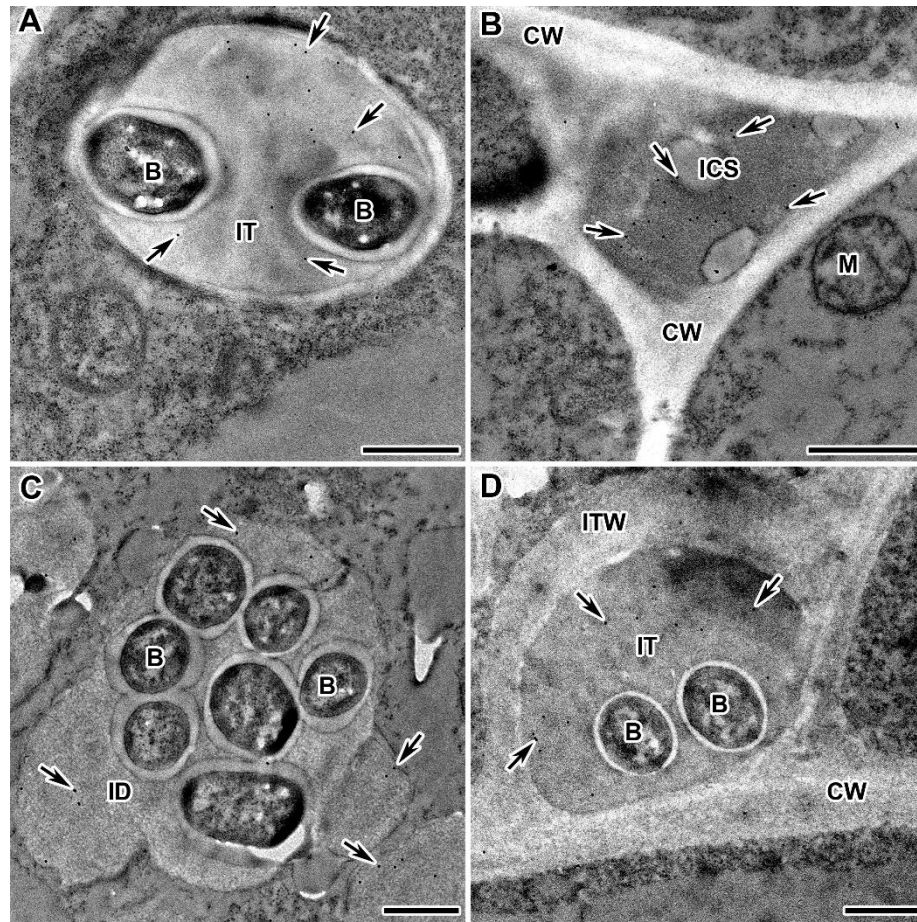

**Figure S3.** Immunogold localisation of extensin labelled with JIM11 in nodules from wild-type and mutant *P. sativum*. The secondary antibody used was the goat anti-rat IgG monoclonal antibody conjugated to 10 nm diameter colloidal gold. (A) Infection thread in the wild-type SGE; (B) three-cell junction in the wild-type SGE; (C) infection droplet in the mutant SGEFix-1 (*sym40-1*); (D) infection thread in the mutant SGEFix-2 (*sym33-3*). CW—cell wall, M—mitochondrion, ICS—intercellular space, IT—infection thread, ITW—infection thread wall, ID—infection droplet, B—bacterium; arrows indicate gold particles. Bar = 500 nm.

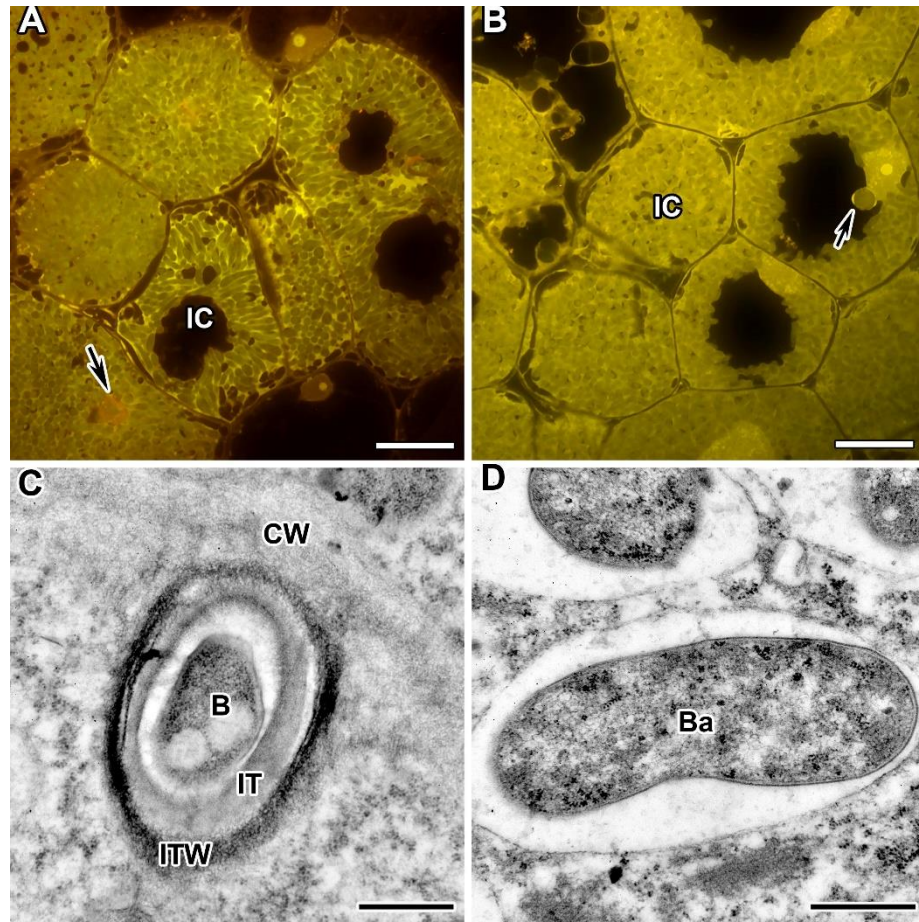

**Figure S4.** Fluorescent and transmission electron micrographs of cells from *P. sativum* (B-D) and *M. truncatula* (A) nodules treated as a negative control. (A) Wild-type *M. truncatula* A17 labelled with LM20 and treated with the anti-mouse secondary antibody conjugated with Alexa Fluor 488. (B) Wild-type *P. sativum* SGE after the omission of the primary antibody. (C) Wild-type *P. sativum* SGE labelled with CCRC-M1 and treated with the anti-rat secondary antibody conjugated to 10 nm diameter colloidal gold. (D) Wild-type *P. sativum* SGE after the omission of the primary antibody. Fluorescent labelling was absent when cells were treated with the unspecific secondary antibody (A), after the omission of the primary antibody (B). Gold particles were absent when cells were treated with the unspecific secondary antibody (C), after the omission of the primary antibody (D). IC—infected cell, IT—infection thread, ITW—infection thread wall, B—bacterium, Ba—bacteroid, arrowheads indicate infection thread. Bars (A,B) = 20  $\mu$ m, (C) = 500 nm, (D) = 200 nm.
